# Supplementary material for: Hepatotoxicity of Nonsteroidal Anti-Inflammatory Drugs: A Systematic Review of Randomized Controlled Trials
Source: Hindawi journal article supplement (doi:10.1155/2018/5253623), 2018-01-01
Supplement: f2 [file 5253623.f2.pdf]

## Supplement 2

**Table 1 Biochemistry markers used in the study**

| No | Study                  | Study design                                                                               | AST   | ALT   | ALP   | Bilirubin | N/A   | note             |
|----|------------------------|--------------------------------------------------------------------------------------------|-------|-------|-------|-----------|-------|------------------|
| 1  | Buxton, et al.1978     | A crossover, double-blind, two 4-weekly treatment study                                    | /     |       | /     | /         |       |                  |
| 2  | Verbruggen, et al.1982 | A crossover, double-blind study                                                            |       |       |       |           | /     | Hepatic function |
| 3  | Turner et al. 1988     | Two randomized, double-blind studies                                                       | /     | /     |       | /         |       |                  |
| 4  | Eversmeyer, et al.1993 | A randomized, open-label, multicenter study                                                | /     | /     |       |           |       |                  |
| 5  | Kennedy, et al. 1994   | A randomized, double blind, parallel, multicenter study                                    | /     | /     |       |           |       |                  |
| 6  | Schmitt , et al.1999   | A randomized, double-blind , multicenter study                                             | /     | /     | /     | /         |       |                  |
| 7  | Morgan, et al.2001     | A randomized, double-blind, parallel,multicenter study                                     | /     | /     | /     | /         |       |                  |
| 8  | McKenna , et al.2001   | A placebo-controlled, randomised, double-blind comparison                                  | /     | /     |       |           |       |                  |
| 9  | Furst, et al.2002      | A randomized, double-blind, double- dummy, parallel study                                  | /     | /     | /     |           |       |                  |
| 10 | Tugwell , et al.2004   | A randomized, double-blind, double-dummy, equivalence study                                | /     | /     |       |           |       |                  |
| 11 | Temper , et al.2006    | A randomized, double-blind, single-dummy, control parallel, multicenter study              | /     | /     |       |           |       |                  |
| 12 | Laine, et al.2009      | Three randomized, double-blind studies: the MEDAL study, EDGE study, and the EDGE II study | /     | /     | /     | /         |       |                  |
| 13 | Dahlberg , et al.2009  | A randomized, double-blind, parallel, multicenter study                                    | /     | /     |       |           |       |                  |
| 14 | Sampalis , et al.2012  | A randomized, double blind, placebo and active comparator controlled pilot study           |       |       |       |           | /     | Liver enz        |
| 15 | Shell , et al.2012     | A randomized, double-blind, controlled study                                               | /     | /     | /     |           |       |                  |
| 16 | Chopra , et al.2013    | A randomized, double-blind, parallel, multicenter                                          | /     | /     | /     | /         |       |                  |
| 17 | Altman, et al.2015     | A open-label, multicenter study                                                            | /     | /     | /     | /         |       |                  |
| 18 | Pinsornsak, et al.2015 | A randomized, double-blind, controlled study                                               | /     | /     | /     |           |       |                  |
|    |                        |                                                                                            | 16    | 15    | 9     | 7         | 2     |                  |
|    |                        |                                                                                            | 88.9% | 83.3% | 38.9% | 38.9%     | 11.1% |                  |
