# Supplementary material for: Hepatotoxicity of Nonsteroidal Anti-Inflammatory Drugs: A Systematic Review of Randomized Controlled Trials
Source: Hindawi journal article supplement (doi:10.1155/2018/5253623), 2018-01-01
Supplement: f3 [file 5253623.f3.pdf]

### Supplement 3

**Table 2** Outcome of studies indicating hepatotoxicity in this systematic review [FULL INFORMATION]

| No. | Study                 | Intervention (dose/day)                  | No. of patients included | Hepatotoxic outcome (Percentage of event)                                    |                                                                             |                                                                               |            |                                              |                                                                                                                                             |                               |
|-----|-----------------------|------------------------------------------|--------------------------|------------------------------------------------------------------------------|-----------------------------------------------------------------------------|-------------------------------------------------------------------------------|------------|----------------------------------------------|---------------------------------------------------------------------------------------------------------------------------------------------|-------------------------------|
|     |                       |                                          |                          | AST > 3 ULN                                                                  | ALT> 3 ULN                                                                  | ALT, AST or both > 3 ULN:                                                     | ALP > 2ULN | Hys Law (ALT > 3 ULN, and bilirubin ≥ 2 ULN) | Liver-related discontinuation                                                                                                               | Liver-related hospitalization |
| 1   | Buxton, et al.1978    | Fenbufen 600 mg                          |                          | 2/20 (10%)(> 5 ULN)                                                          |                                                                             |                                                                               | 3/20 (15%) |                                              |                                                                                                                                             |                               |
| 5   | Kennedy, et al. 1994  | Diclofenac150mg                          | 20                       |                                                                              |                                                                             | 14/121 (12%) (> 3 ULN)<br>5/121 (4.1%) (> 8 ULN)                              |            |                                              |                                                                                                                                             |                               |
| 8   | McKenna , et al.2001  | Diclofenac 150 mg                        | 121                      | 2/199 (1%)                                                                   | 5/199 (2.5%)                                                                |                                                                               |            |                                              |                                                                                                                                             |                               |
| 10  | Tugwell , et al.2004  | Diclofenac 150 mg                        | 199                      | 4/311 (1.4%)                                                                 | 13/311 (4.7%)                                                               |                                                                               |            |                                              |                                                                                                                                             |                               |
|     |                       | Topical diclofenac 1.5 % w/w 1.55 ml     | 311                      | 1/311 (0.4%)                                                                 | 3/311 (1.1%)                                                                |                                                                               |            |                                              |                                                                                                                                             |                               |
| 12  | Laine, et al.2009     | Diclofenac 150 mg                        | 311                      | 246/17,045 (1.4)<br>104/17,045 (0.6) (> 5 ULN)<br>31/17,045 (0.2) (> 10 ULN) | 511/17,053 (3.0)<br>228/17,053 (1.3) (> 5 ULN)<br>83/17,053 (0.5) (> 10ULN) |                                                                               |            | 2/17,289 (0.012%)                            | 461/17,289 (2.7%)                                                                                                                           | 4/17,289 (0.023%)             |
|     |                       | Etoricoxib 60 or 90 mg                   | 17053                    |                                                                              |                                                                             | 116/17,217 (0.7%)<br>38/17,217 (0.2%) (> 5 ULN)<br>8/17,217 (0.05%) (> 10ULN) |            | 1/17,412 (0.006%)                            | 57/17,412 (0.3%)                                                                                                                            |                               |
| 13  | Dahlberg , et al.2009 | Diclofenac 50 mg                         | 17217                    |                                                                              |                                                                             |                                                                               |            |                                              |                                                                                                                                             | 5458 (1.1%)                   |
| 16  | Chopra , et al.2013   | Celecoxib 200 mg                         | 458                      |                                                                              | 2/105 (1.9%)                                                                |                                                                               |            |                                              |                                                                                                                                             |                               |
|     |                       | SGCG & SCG                               | 105                      |                                                                              | 10/220 (4.5%)(3.6 ULN)                                                      |                                                                               |            |                                              | 7/220 (3.2%) (ALT >3 ULN)                                                                                                                   |                               |
| 17  | Altman, et al.2015    | Low dose solumatrix diclofenac 75-105 mg | 220                      | 8/585 (1.4%)                                                                 | 24/585 (4.1%)                                                               |                                                                               |            | 1/585 (0.2%)                                 | 23/601 (3.8%) (From increase ALT, 10 (1.7%); increase AST, 6 (1%), abnormal liver function test, 5 (0.8%) and increase hepatic enz 2 (0.3%) |                               |
